# Supplementary material for: Deciphering mitotic catastrophe–associated transcriptomic patterns to predict prognosis and immunotherapy response in renal cell carcinoma
Source: Research Square preprint supplement (doi:10.21203/rs.3.rs-8876859/v1), 2026-02-20
Supplement: Supplementary file 1 [file 83fb59eb84f44e841f14db96.docx]

# Table 1. Baseline clinic characteristics of WCH-FHRCC(n=54)

| Characteristics | MCRS-Low (n = 27) | MCRS-High (n = 27) | P value |
| --- | --- | --- | --- |
| pT stage, n (%) |  |  | 0.171 |
| T < 3 | 15 (55.6%) | 9 (33.3%) |  |
| T ≥ 3 | 12 (44.4%) | 18 (66.7%) |  |
| pN stage, n (%) |  |  | 0.271 |
| N0 | 18 (66.7%) | 13 (48.1%) |  |
| N1 | 9 (33.3%) | 14 (51.9%) |  |
| pM stage, n (%) |  |  | 0.028 |
| M0 | 20 (74.1%) | 11 (40.7%) |  |
| M1 | 7 (25.9%) | 16 (59.3%) |  |
| Gender, n (%) |  |  | 0.773 |
| Female | 8 (29.6%) | 10 (37.0%) |  |
| Male | 19 (70.4%) | 17 (63.0%) |  |
| Age, n (%) |  |  | 0.119 |
| < 60 | 27 (100%) | 23 (85.2%) |  |
| ≥ 60 | 0 (0%) | 4 (14.8%) |  |
