# Supplementary material for: Deciphering mitotic catastrophe–associated transcriptomic patterns to predict prognosis and immunotherapy response in renal cell carcinoma
Source: Research Square preprint supplement (doi:10.21203/rs.3.rs-8876859/v1), 2026-02-20
Supplement: Supplementary file 2 [file c09de7f2e4e54b1c7e5ac805.docx]

Table S1. Baseline clinicopathologic and CT imaging characteristics of patients in the TCGA-KIRC cohort

| characteristics | MCRS-Low | MCRS-High | pvalue | statistic | method |
| --- | --- | --- | --- | --- | --- |
| n | 97 | 97 |  |  |  |
| tumor size, median (IQR) | 4.6 (3.2, 6.3) | 6.1 (4.3, 9.3) | 0.000191042857319509 |  | Wilcoxon |
| tumor architecture (solid or Multicystic), n (%) |  |  | 0.181024115101775 | 1.78919631093544 | Chisq test |
| Solid | 77 (39.7%) | 84 (43.3%) |  |  |  |
| Multicystic | 20 (10.3%) | 13 (6.7%) |  |  |  |
| tumor margin (Ill-defined or Well-defined), n (%) |  |  | 1.13879109015167e-05 | 19.2632197414806 | Chisq test |
| Well-defined | 87 (44.8%) | 61 (31.4%) |  |  |  |
| Ill-defined | 10 (5.2%) | 36 (18.6%) |  |  |  |
| spiculated margin(the Present of at least one sharp protrusion on the tumor margin, and the distance between the tumor margin and the furthest point of the sharp protrusion was more than Absent.5mm), n (%) |  |  | 0.0222986160585804 | 5.22233300099701 | Chisq test |
| Absent | 93 (47.9%) | 84 (43.3%) |  |  |  |
| Present | 4 (2.1%) | 13 (6.7%) |  |  |  |
| enhancement pattern (Homogeneous or Nodular enhancement on nephrographic-phase images), n (%) |  |  | 0.0385184083706309 | 4.28198198198198 | Chisq test |
| Homogeneous | 67 (34.5%) | 53 (27.3%) |  |  |  |
| Nodular enhancement | 30 (15.5%) | 44 (22.7%) |  |  |  |
| intratumoral calcification, n (%) |  |  | 0.247399164232734 | 1.33793103448276 | Chisq test |
| Absent | 76 (39.2%) | 69 (35.6%) |  |  |  |
| Present | 21 (10.8%) | 28 (14.4%) |  |  |  |
| intratumoral angiogenesis, n (%) |  |  | 0.000124199003652398 | 14.7278361163711 | Chisq test |
| Absent | 89 (45.9%) | 68 (35.1%) |  |  |  |
| Present | 8 (4.1%) | 29 (14.9%) |  |  |  |
| necrosis(the Present of more than 5Absent% areas within the tumor that did not demonstrate contrast enhancement during the nephrographic and delayed phase), n (%) |  |  | 0.00811045635781581 | 7.00892060660125 | Chisq test |
| Present | 50 (25.8%) | 68 (35.1%) |  |  |  |
| Absent | 47 (24.2%) | 29 (14.9%) |  |  |  |
| renal vein invasion, n (%) |  |  | 7.51415034715817e-05 | 15.6767676767677 | Chisq test |
| Absent | 96 (49.5%) | 80 (41.2%) |  |  |  |
| Present | 1 (0.5%) | 17 (8.8%) |  |  |  |
| collecting system invasion, n (%) |  |  | 0.0297096430046607 | 4.72601503759399 | Chisq test |
| Absent | 92 (47.4%) | 83 (42.8%) |  |  |  |
| Present | 5 (2.6%) | 14 (7.2%) |  |  |  |

Table S2 Single-cell annotation Maker

| # Main class | |
| --- | --- |
| cell_markers4$`Imm` <- c("PTPRC") | |
| cell_markers4$`Fibro` <- c("COL1A1") | |
| cell_markers4$`Endo` <- c("VWF") | |
| cell_markers4$`Epi` <- c("EPCAM") | |
|  |  |
| # Subclass | |
| cell_markers4$`T cells` <- c("CD3D", "CD3E") | |
| cell_markers4$`CD8 T` <- c("CD8A") | |
| cell_markers4$`CD4 T` <- c("CD4") | |
| cell_markers4$`MAIT` <- c("SLC4A10") | |
| cell_markers4$`Treg` <- c("FOXP3","CTLA4","TNFRSF18","LAYN","TNFRSF9","IKZF2","IL2RA","BATF") | |
| cell_markers4$`B cells+Plasma` <- c("CD79A") | |
| cell_markers4$`B cells` <- c("MS4A1", "MZB1") | |
| cell_markers4$`Hematopoietic stem cell` <- c("CD34") | |
|  |  |
| # Proliferating cells | |
| cell_markers4$`Prolife` <- c("SPP1I67", "TOP2A", "CENPF", "MCM6") | |
|  |  |
| # NK cells |  |
| cell_markers4$`NK cells` <- c("KLRF1") | |
| cell_markers4$`CD16+ NK` <- c("FCGR3A") | |
| cell_markers4$`NK sub` <- c("CCL1") | |
|  |  |
| cell_markers4$`Mast cells` <- c("TPSAB1") | |
|  |  |
| # Myeloid cells | |
| cell_markers4$`Myeloid` <- c("ITGAX", "ITGAM", "LYZ") | |
| cell_markers4$`Macro` <- c("LYZ", "LYVE1") | |
| cell_markers4$`Mono` <- c("FCN1", "VCAN", "FCGR3A", "FCGR3B") | |
| cell_markers4$`Neu` <- c("LCN2", "CSF3R") | |
| cell_markers4$`DC` <- c("ITGAX") | |
| cell_markers4$`pDC` <- c("LILRA4") | |
| cell_markers4$`cDC1` <- c("CLEC9A", "XCR1") | |
| cell_markers4$`cDC2` <- c("CD1C") | |
| cell_markers4$`LAMP3-DC` <- c("LAMP3") | |
|  |  |
| # Fibroblast cells | |
| cell_markers4$`Myofibro` <- c("MYH11", "ACTG2") | |
| cell_markers4$`Pericyte` <- c("RGS5") | |
| #cell_markers$`Other Fibro` <- c("iCAF", "mCAF", "APCAF", "CCL19+") | |
|  |  |
| # Specific marker | |
| cell_markers4$`doublets` <- c("LYZ", "CD3E") | |
| cell_markers4$`CCNF` <- c("CCNF") | |

Table S3 CCNF overexpression plasmid

Target sequence 1:

GATCGTCAGGCCAGGAAGTCATGTTTCTCGAGAAACATGACTTCCTGGCCTGATTTTTT

Target sequence 2:

GATCGTCAGGCCAGGAAGTCATGTTTCTCGAGAAACATGACTTCCTGGCCTGATTTT

Table S4

source data for Figure 9F that describe RCC tumour growth

| Days | OE-Ctrl1 | OE-Ctrl2 | OE-Ctrl3 | OE-Ctrl4 | OE-Ctrl5 | OE-CCNF1 | OE-CCNF2 | OE-CCNF3 | OE-CCNF4 | OE-CCNF5 |
| --- | --- | --- | --- | --- | --- | --- | --- | --- | --- | --- |
| 0 | 0 | 0 | 0 | 0 | 0 | 0 | 0 | 0 | 0 | 0 |
| 7 | 5.64 | 4.3361 | 10.233 | 13.232 | 12.314 | 42.312 | 54.3566 | 15.7605 | 35.2323 | 36.103 |
| 10 | 14.112 | 13.95 | 17.1 | 23.12 | 18.45 | 73.75 | 80.19 | 28.88 | 61.2255 | 74.1285 |
| 13 | 24.624 | 22.05 | 17.92 | 25.1125 | 24.854 | 79.768 | 86.2125 | 29.4335 | 66.25 | 85.6745 |
| 16 | 30.42 | 23.275 | 20.48 | 26.568 | 27.5625 | 81.12 | 87.725 | 30.8025 | 71.656 | 92.2625 |
| 19 | 37.6 | 24.624 | 21.78 | 34.2225 | 28.175 | 85.176 | 93.775 | 40 | 75.843 | 92.697 |
| 21 | 40 | 25.272 | 22.542 | 34.983 | 36.8 | 90.75 | 120.9325 | 94.982 | 75.843 | 105.875 |
| 24 | 50.625 | 27.38 | 24.5 | 40.8 | 37.6 | 98.784 | 138.915 | 137.628 | 92.2625 | 169.805 |
| 27 | 63.132 | 46.1415 | 46.575 | 57.132 | 40 | 128.384 | 168.776 | 157.132 | 103.715 | 261.688 |
| 30 | 77.132 | 65 | 29.602 | 87.132 | 66.654 | 139.838 | 181.3 | 187.132 | 112.786 | 295.695 |
| 33 | 86.208 | 87.044 | 46.2275 | 117.4 | 81.944 | 156.368 | 246.5195 | 239.248 | 121.4 | 356.45 |

OE, Overexpression

Figure S1 Extended Data Figure

Samples were run on the same gel for OS-RC-2 and Caki-1

OS-RC-2


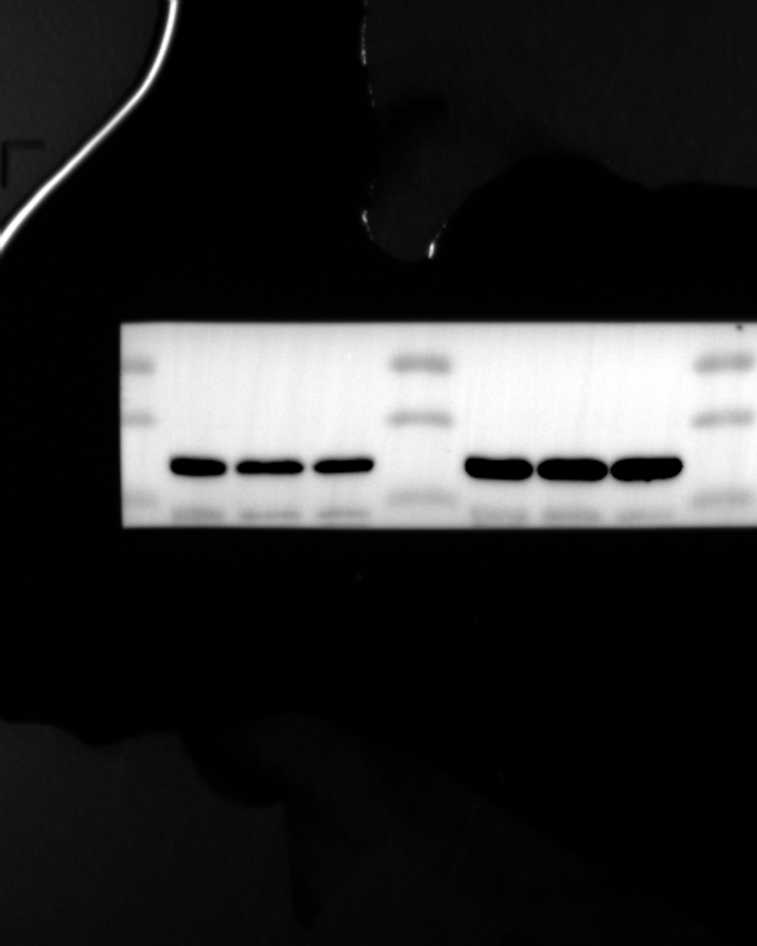

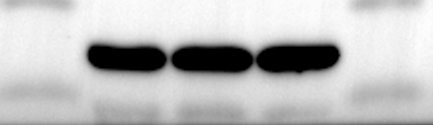

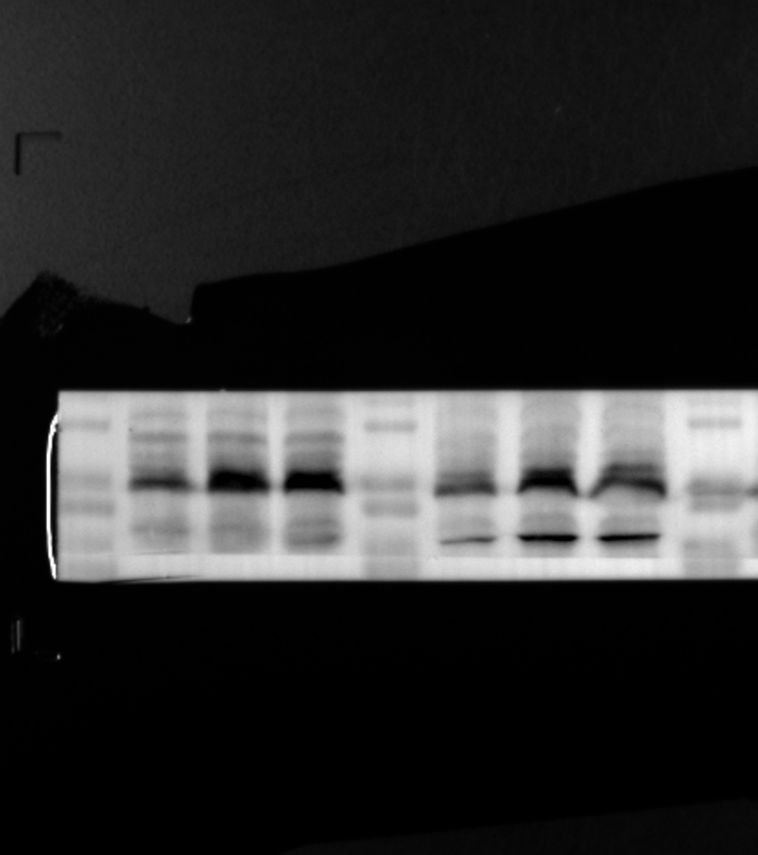

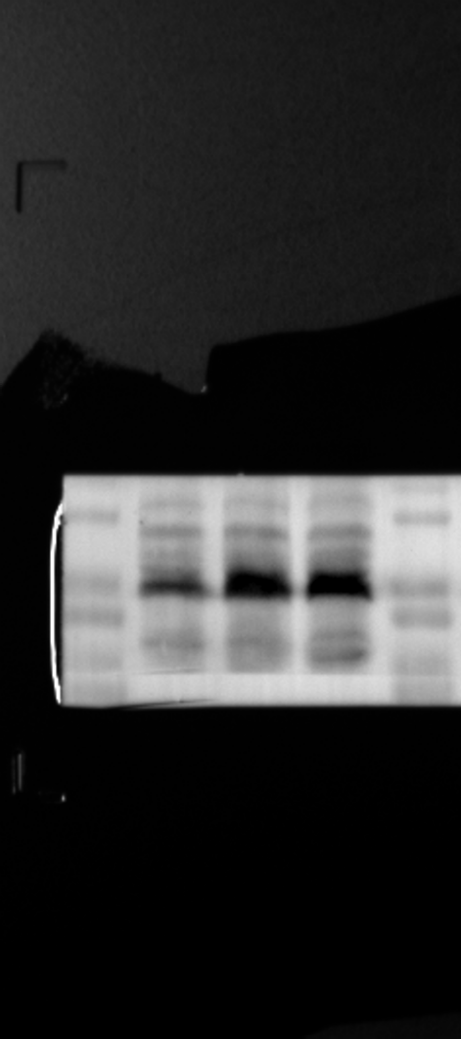


Repeat

180 kDa

140 kDa

100 kDa

75 kDa

60 kDa

45 kDa

35 kDa

anti-CCNF(88kDa)

anti-GAPDH(36kDa)

Caki-1

140 kDa

100 kDa

75 kDa

45 kDa

35 kDa


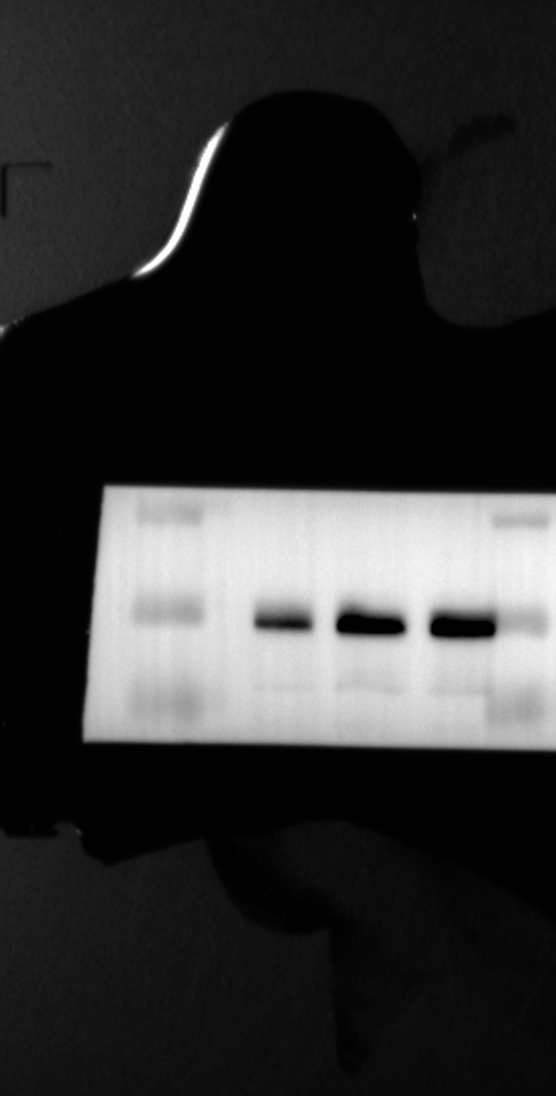


anti-CCNF(88kDa)


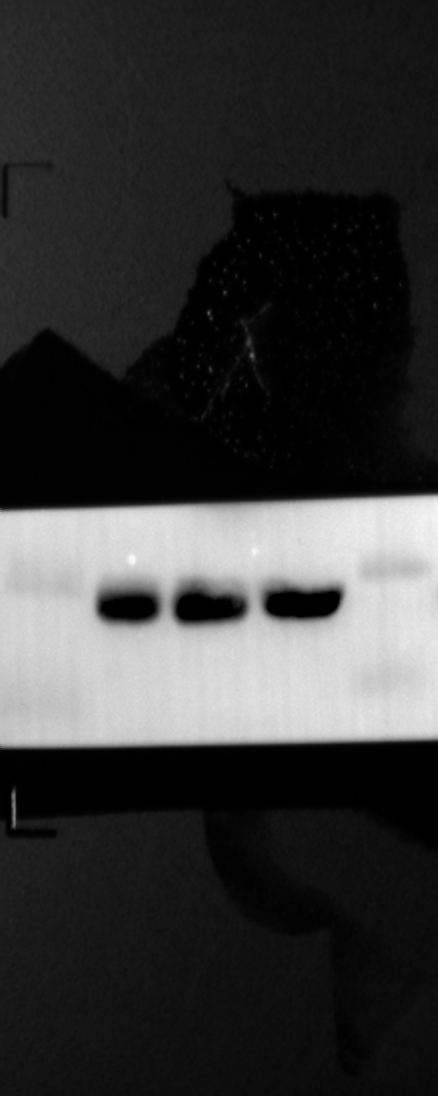


anti-GAPDH(36kDa)

Repeat


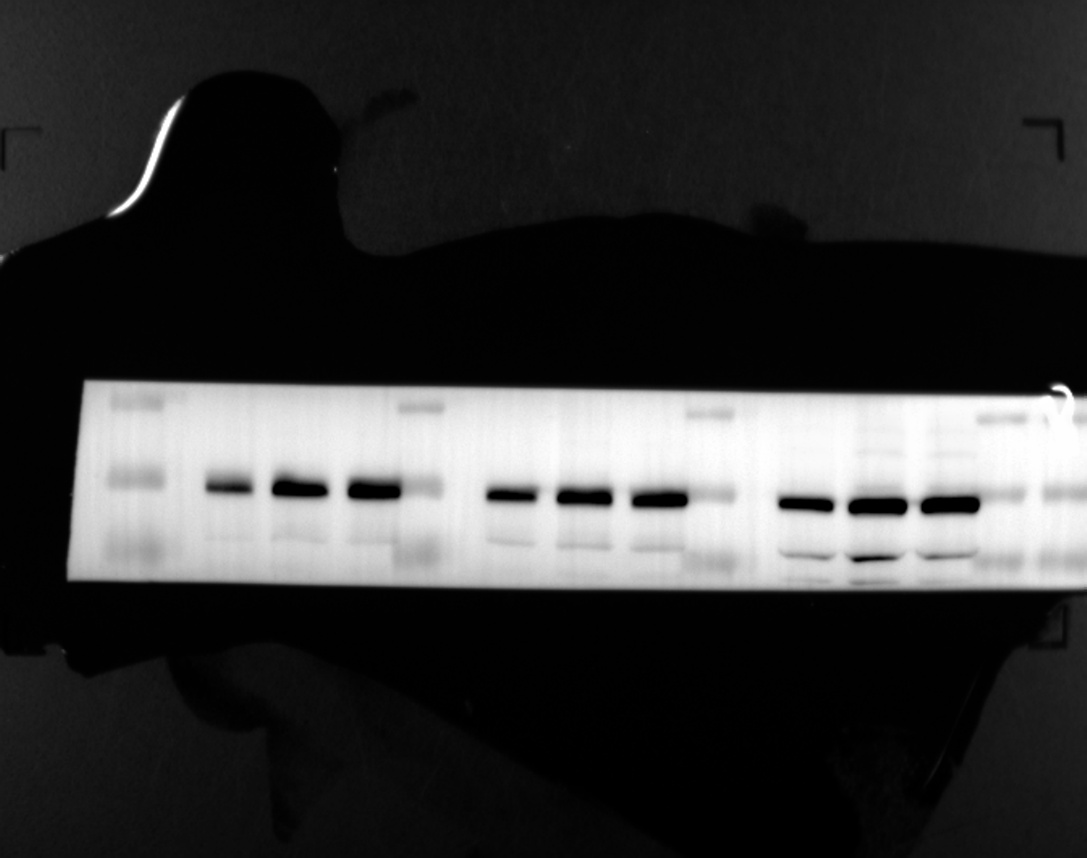


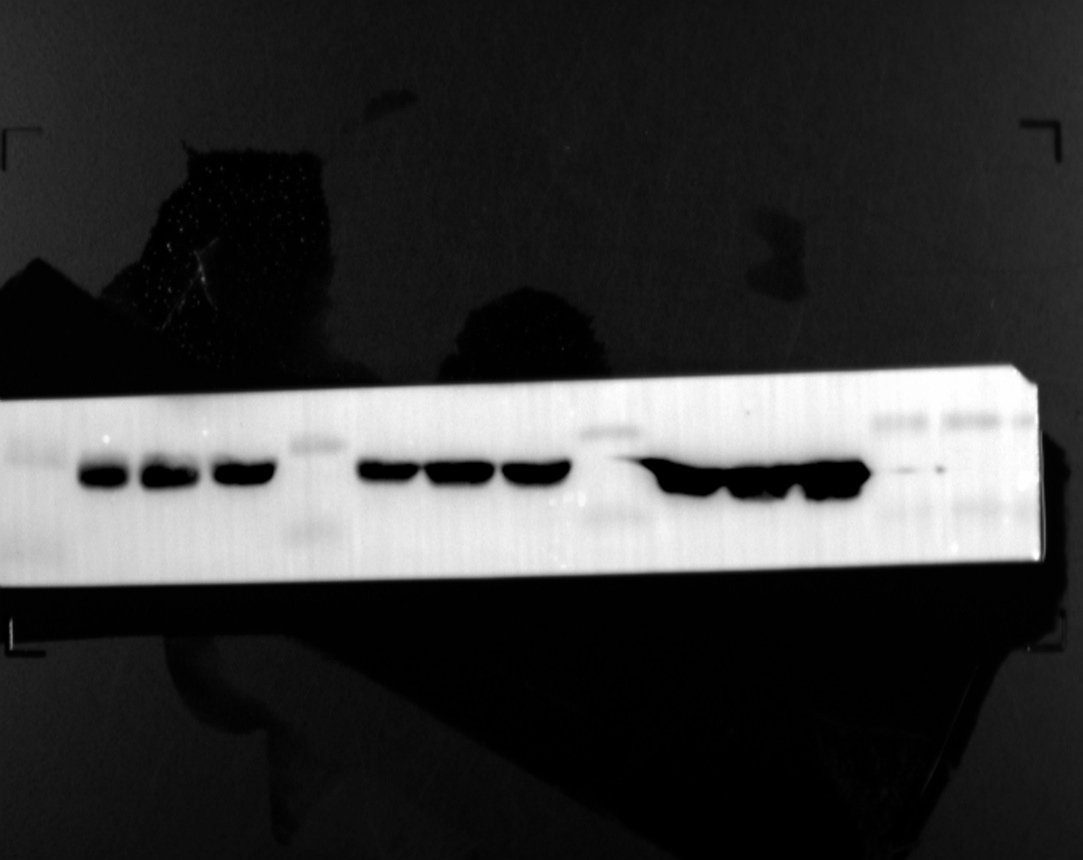


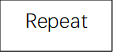

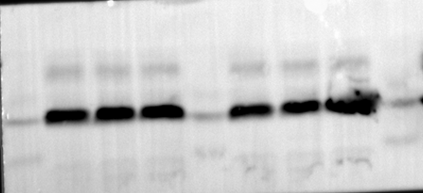

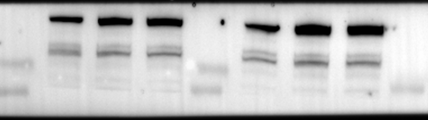

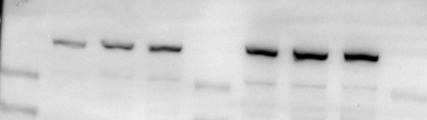

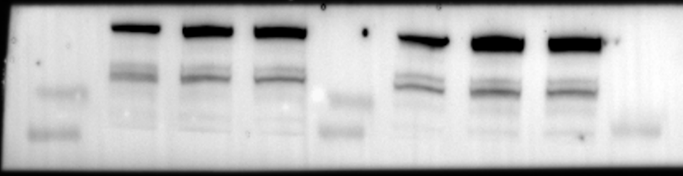

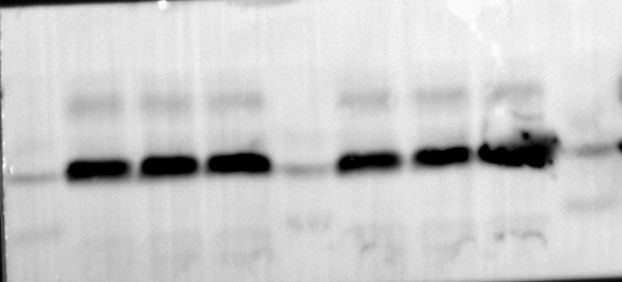

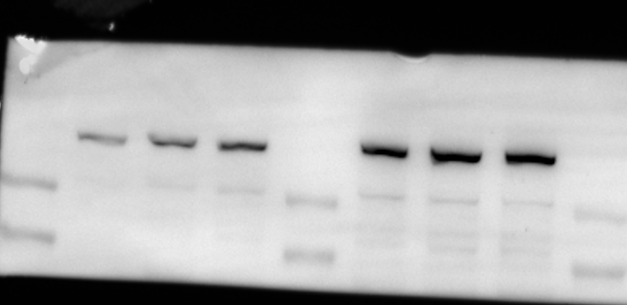


35 kDa

250 kDa

250 kDa

anti-GAPDH(36kDa)

anti-p-mTOR(288kDa)

anti-mTOR(288kDa)

OS-RC-2
